# Supplementary material
Source: publisher figshare collection journal article supplement (https://sage.figshare.com/ndownloader/files/16347455)

**Figure S2.** Real-time PCR results for *E. coli* 2011C-4315 (A) and *E. coli* 2012C-4431 (B) performed using DNA isolated from bacterial suspensions treated with heat stabilization via the Denator Stabilizor T1 instrument and untreated control suspensions. Compatible dose responses of amplification and melt curves are observed for both strains.

**A)**


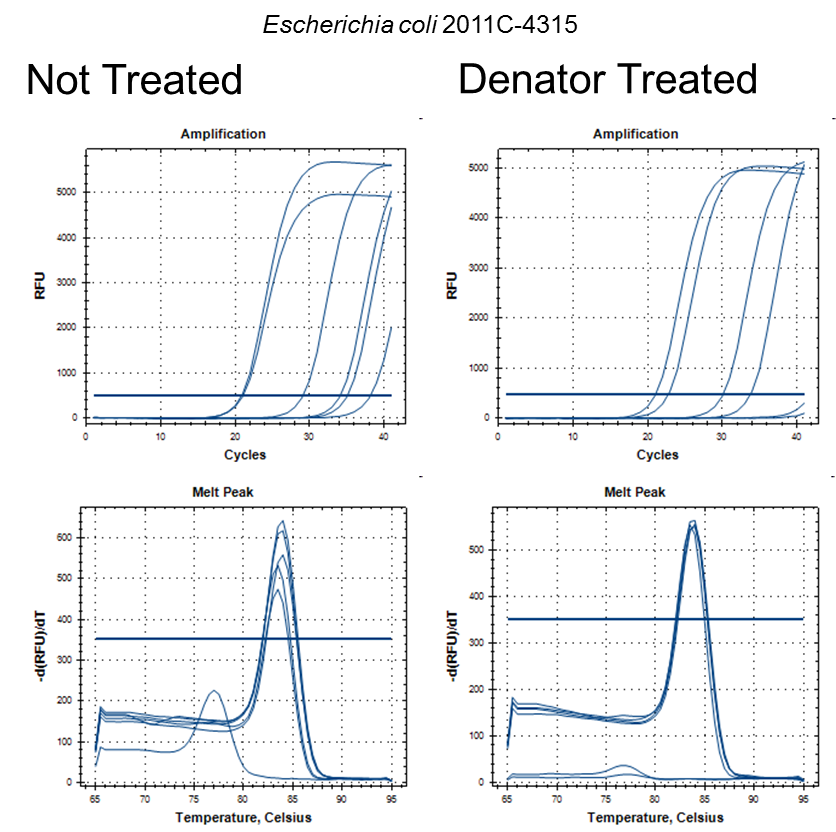


**B)**


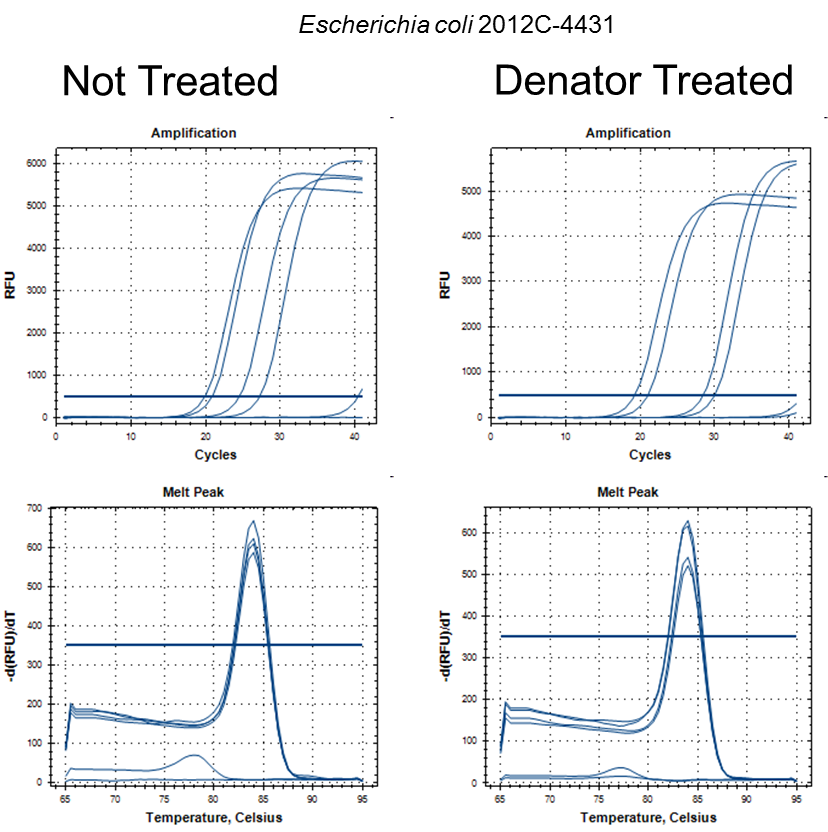

Supplement: Supplementary file 1 [file 16347455]
